# Supplementary material
Source: Springer Nature journal article supplement (https://www.springermedizin.de/resource/supplementary/12960_2008_158_MOESM1_ESM.pdf/9570540)

a) Newborn

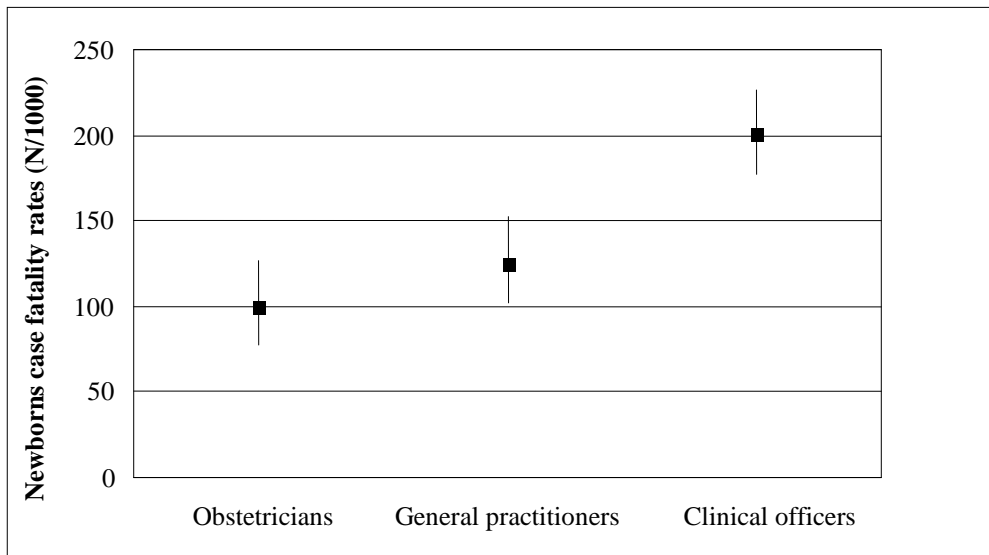

b) Mother

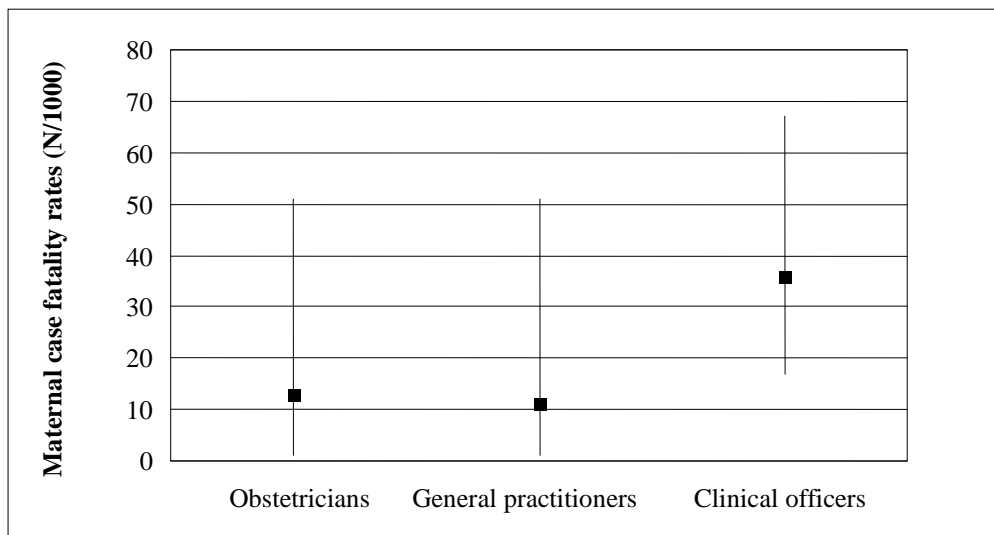

Supplement: MOESM1 [file 9570540]
